# Supplementary material for: Circulating Plasma Gelsolin: A Predictor of Favorable Clinical Outcomes in Head and Neck Cancer and Sensitive Biomarker for Early Disease Diagnosis Combined with Soluble Fas Ligand
Source: Cancers (Basel). 2020 Jun 13;12(6):1569. doi: 10.3390/cancers12061569 (PMC7353036; doi:10.3390/cancers12061569)
Supplement: Supplementary file 1 [file cancers-12-01569-s001.pdf]

# Circulating Plasma Gelsolin: A Predictor of Favorable Clinical Outcomes in Head and Neck Cancer and Sensitive Biomarker for Early Disease Diagnosis Combined with Soluble Fas Ligand

Chen-Tzu Chiu <sup>1,†</sup>, Pei-Wen Wang <sup>2,3,†</sup>, Meshach Asare-Werehene <sup>4,5</sup>, Benjamin K. Tsang <sup>4,5</sup> and Dar-Bin Shieh <sup>1,2,3,6,\*</sup>

<sup>1</sup> Institute of Basic Medical Sciences, National Cheng Kung University, Tainan 70101, Taiwan;

[dinosaurchiu@gmail.com](mailto:dinosaurchiu@gmail.com)

<sup>2</sup> Institute of Oral Medicine and Department of Stomatology, College of Medicine, National Cheng Kung University Hospital, National Cheng Kung University, Tainan 70101, Taiwan; [peiwen1005@gmail.com.tw](mailto:peiwen1005@gmail.com.tw)

<sup>3</sup> Center of Applied Nanomedicine, National Cheng Kung University, Tainan 70101, Taiwan

<sup>4</sup> Departments of Obstetrics & Gynecology and Cellular & Molecular Medicine, University of Ottawa, Ottawa, ON, Canada; [masarewerehene@yahoo.com](mailto:masarewerehene@yahoo.com) (M.A.-W.), [btsang@ohri.ca](mailto:btsang@ohri.ca) (B.K.T.)

<sup>5</sup> Chronic Disease Program, Ottawa Hospital Research Institute, Ottawa, ON K1H 8L6, Canada

<sup>6</sup> Center for Micro/Nano Science and Technology, Advanced Optoelectronic Technology Center, Innovation Center for Advanced Medical Device Technology, National Cheng Kung University, Tainan 70101, Taiwan

\* Correspondence: [darbinshieh@gmail.com](mailto:darbinshieh@gmail.com); Tel.: +886-6-235-3535 (ext. 5899)

† Equal contribution

Received: 11 May 2020; Accepted: 09 June 2020; Published: date

**Table S1.** Patient Characteristics for HNC.

| Characteristics          | Number of Patients (%) |
|--------------------------|------------------------|
| Age (Range; 22–81 years) |                        |
| ≤ 53                     | 105 (52%)              |
| > 53                     | 97 (48%)               |
| Differentiation          |                        |
| Well                     | 104 (51.5%)            |
| Moderate                 | 73 (36.1%)             |
| Poor                     | 17 (8.4%)              |
| Not verified             | 8 (4%)                 |
| TNM stage                |                        |
| I                        | 33 (16.3%)             |
| II                       | 52 (25.7%)             |
| III                      | 40 (19.8%)             |
| IV                       | 77 (38.1%)             |
| TNM stage                |                        |
| ≤ 2                      | 85 (42.1%)             |
| > 2                      | 117 (58%)              |
| Recurrence               |                        |
| No                       | 147 (72.8%)            |
| Yes                      | 55 (27.2%)             |
| Vital status             |                        |
| Alive                    | 126 (62.4%)            |
| Dead                     | 76 (37.6%)             |

**Table S2.** Tumor sites of the HNC patients.

| Tumor site     | Total (%)  | TNM Stage  |            |
|----------------|------------|------------|------------|
|                |            | Early (%)  | Late (%)   |
| Buccal         | 78 (38.6%) | 35 (44.6%) | 43 (55.4%) |
| Tongue         | 72 (35.6%) | 28 (37.8%) | 44 (62.3%) |
| Gingivae       | 30 (14.8%) | 12 (41.4%) | 18 (58.6%) |
| Lip            | 8 (4%)     | 3 (37.5%)  | 5 (62.5%)  |
| Maxilla        | 4 (2%)     |            |            |
| Floor of mouth | 3 (1.5%)   |            |            |
| Retro-molar    | 1 (0.5%)   |            |            |
| Others         | 6 (3%)     |            |            |

**Table S3.** Crude and adjusted HR for OS and PFS.

|                      | Low pGSN          | High pGSN      | <i>p</i> value |
|----------------------|-------------------|----------------|----------------|
|                      | <i>n</i> = 101    | <i>n</i> = 101 |                |
| <b>Event rate</b>    | 39 (38.61%)       | 26 (25.74%)    |                |
| <b>OS</b>            |                   |                |                |
| Crude HR (95% CI)    | 1.68 (1.02–2.76)* | 1              | 0.041          |
| Adjusted HR (95% CI) | 1.87 (1.08–3.25)* | 1              | 0.026          |
| <b>PFS</b>           |                   |                |                |
| Crude HR (95% CI)    | 1.78 (1.09–2.92)* | 1              | 0.021          |
| Adjusted HR (95% CI) | 1.78 (1.07–2.95)* | 1              | 0.025          |

HR, hazard ratio; CI, confidence interval; OS, overall survival; PFS, progression-free survival.

\* Estimated from Cox proportional hazard regression model. Significant variables ( $p < 0.05$ ) in univariate Cox regression model were included in the multivariate analysis. Multivariable Cox proportional hazard model was adjusted for TNM\_T, TNM\_N and stage.
